# Supplementary material
Source: publisher figshare collection journal article supplement (https://acs.figshare.com/ndownloader/files/25560293)
Supplement: Supplementary file 1 [file 25560293]

Supporting information for

## **Exploring Volatility Properties of Discrete Secondary Organic Aerosol Constituents of $\alpha$ -Pinene and Polycyclic Aromatic Hydrocarbons**

**Zaeem Bin Babar<sup>1,2</sup>, Fawad Ashraf<sup>1,3</sup>, Jun-Hyun Park<sup>1</sup>, Pham Duy Quang Dao<sup>4</sup>, Chan Sik Cho<sup>4</sup>, Ho-Jin Lim<sup>1,\*</sup>**

<sup>1</sup>*Department of Environmental Engineering, Kyungpook National University, Daegu 41566, Republic of Korea*

<sup>2</sup>*Institute of Energy and Environmental Engineering, University of the Punjab, Lahore 54590, Pakistan*

<sup>3</sup>*Department of Chemical Engineering, COMSATS Institute of Information Technology, Defence Road, Off Raiwind Road, Lahore 54000, Pakistan*

<sup>4</sup>*Department of Applied Chemistry, Kyungpook National University, Daegu 41566, Republic of Korea*

\*Corresponding author. Tel: 82-53-950-7546; Fax: 82-53-950-6579

Email address: [hjlim@knu.ac.kr](mailto:hjlim@knu.ac.kr)

## Synthetic Procedures for SOA Constituents

### Synthesis of 3-methylbutane-1,2,3-tricarboxylic acid (3-MBTCA) (**4**)<sup>1</sup>

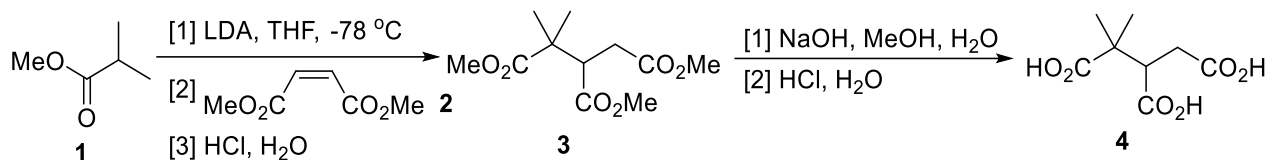

A solution of methyl isobutyrate (**1**) (1.02 g, 10 mmol) in anhydrous tetrahydrofuran (4 mL) was added to a cooled solution of LDA in THF (2.0 M, 5 mL) at -70 °C over 15 min. The colorless solution was stirred for 15 min at -70 °C and a solution of dimethyl maleate (**2**) (1.44 g, 10 mmol) in anhydrous tetrahydrofuran (4 mL) was added dropwise over 15 min. Over the course of addition, the reaction mixture changed from colorless to yellow. The reaction mixture was stirred for 30 min at -70 °C and then poured into a cooled 1 M aqueous HCl solution (22 mL) and extracted with dichloromethane (3 times x 20 mL). Removal of the combined organic solvent under reduced pressure left behind a crude mixture, which was separated by vacuum distillation to give triester **3** (bp 108 °C/15 mmHg, 1.72 g, 70%) as a colorless turbid oil. **Trimethyl 3-methylbutane-1,2,3-tricarboxylate (3)**. <sup>1</sup>H NMR (500 MHz, CDCl<sub>3</sub>) δ 1.20 (s, 3H), 1.21 (s, 3H), 2.40 (dd, *J* = 16.8 and 3.3 Hz, 1H), 2.81 (dd, *J* = 16.8 and 11.4 Hz, 1H), 3.32 (dd, *J* = 11.4 and 3.3 Hz, 1H), 3.68 (s, 3H), 3.69 (s, 3H), 3.70 (s, 3H). <sup>13</sup>C NMR (125 MHz, CDCl<sub>3</sub>) δ 22.3, 23.2, 32.4, 44.0, 48.0, 51.9 (x2), 52.2, 172.5, 173.1, 176.4.

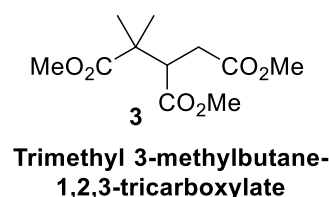

Triester **3** (0.74 g, 3 mmol) was added to a solution of NaOH (1.90 g, 48 mol) in H<sub>2</sub>O (6 mL) and MeOH (6 mL) and the mixture was stirred for 4 h at reflux. The mixture was cooled in an ice bath and acidified with a 1 M aqueous HCl solution (pH 1) until a white solid was formed. The suspension was extracted with dichloromethane (7 times x 10 mL), dried over Na<sub>2</sub>SO<sub>4</sub>, and evaporated under reduced pressure to obtain triacid **4** (0.60 g, 98%) as a white solid. **3-Methylbutane-1,2,3-tricarboxylic acid (4)**. Mp 151-153 °C (154-155 °C<sup>1b</sup>). <sup>1</sup>H NMR (500 MHz, CD<sub>3</sub>OD) δ 1.12 (s, 3H), 1.13 (s, 3H), 2.53 (dd, *J* = 17.0 and 3.6 Hz, 1H), 2.68 (dd, *J* = 17.0 and 11.5 Hz, 1H), 3.15 (dd, *J* = 11.5 and 3.6 Hz, 1H). <sup>13</sup>C NMR (125 MHz, CD<sub>3</sub>OD) δ 22.6, 23.2, 32.9, 44.4, 49.1, 177.2, 177.5, 181.5.

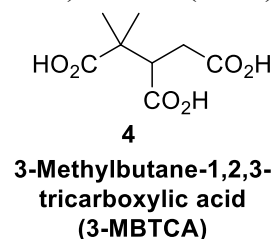

## Synthesis of terpenylic acid (**7**)<sup>2-4</sup>

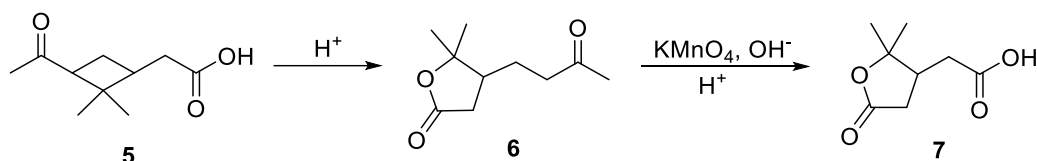

*cis*-Pinonic acid **5** (2.0 g, 10.9 mmol) was dissolved in 42.6 g of an aqueous 50% H<sub>2</sub>SO<sub>4</sub> solution and the mixture was heated for 30 min at 100 °C. To the resulting brown mixture was added distilled water (60 mL) and the mixture was further saturated with (NH<sub>4</sub>)<sub>2</sub>SO<sub>4</sub>. The mixture was extracted with dichloromethane (3 times x 20 mL), dried over Na<sub>2</sub>SO<sub>4</sub>, and evaporated under reduced pressure to yield homoterpenyl methyl ketone **6** (2.0 g, 100%). **5,5-Dimethyl-4-(3-oxobutyl)dihydrofuran-2(3H)-one (6)**. Mp 61-63 °C (63-64 °C<sup>2d</sup>). <sup>1</sup>H NMR (500 MHz, CDCl<sub>3</sub>) δ 1.28 (s, 3H), 1.46 (s, 3H), 1.50-1.58 (m, 1H), 1.78-1.84 (m, 1H), 2.17 (s, 3H), 2.18-2.22 (m, 1H), 2.28 (dd, *J* = 16.9 and 11.6 Hz, 1H), 2.40-2.54 (m, 2H), 2.59 (dd, *J* = 16.9 and 7.7 Hz, 1H). <sup>13</sup>C NMR (125 MHz, CDCl<sub>3</sub>) δ 21.9, 23.2, 27.4, 30.1, 34.8, 41.8, 45.1, 86.7, 175.2, 207.2.

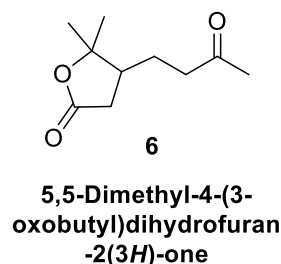

To homoterpenyl methyl ketone **6** (1.5 g, 8.1 mmol) dissolved in a 0.93 M aqueous KOH solution (30 mL), a 0.16 M aqueous KMnO<sub>4</sub> solution (150 mL) was added over 10 min. After removal of the brown precipitate by filtration, the aqueous mixture was acidified with a 10% aqueous H<sub>2</sub>SO<sub>4</sub> solution and extracted with diethyl ether. The organic phase was dried over Na<sub>2</sub>SO<sub>4</sub>, evaporated, and recrystallized (hexane/diethyl ether) to give terpenylic acid **7** (1.0 g, 72%). **2-(2,2-Dimethyl-5-oxotetrahydrofuran-3-yl)acetic acid (7)**. Mp 89-91 °C (90 °C<sup>2e</sup>). <sup>1</sup>H NMR (500 MHz, CDCl<sub>3</sub>) δ 1.30 (s, 3H), 1.48 (s, 3H), 2.38 (dd, *J* = 10.4 and 17.5 Hz, 1H), 2.40 (dd, *J* = 10.2 and 16.2 Hz, 1H), 2.56 (dd, *J* = 4.7 and 16.2 Hz, 1H), 2.67-2.74 (m, 1H), 2.86 (dd, *J* = 8.2 and 17.5 Hz, 1H). <sup>13</sup>C NMR (125 MHz, CDCl<sub>3</sub>) δ 22.2, 27.3, 34.4, 35.1, 41.3, 86.0, 175.3, 176.5.

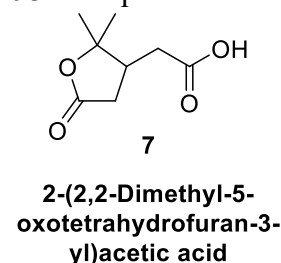

## Synthesis of diaterpenylic acid acetate (DTAA) (12)

### Procedure A <sup>5,6</sup>

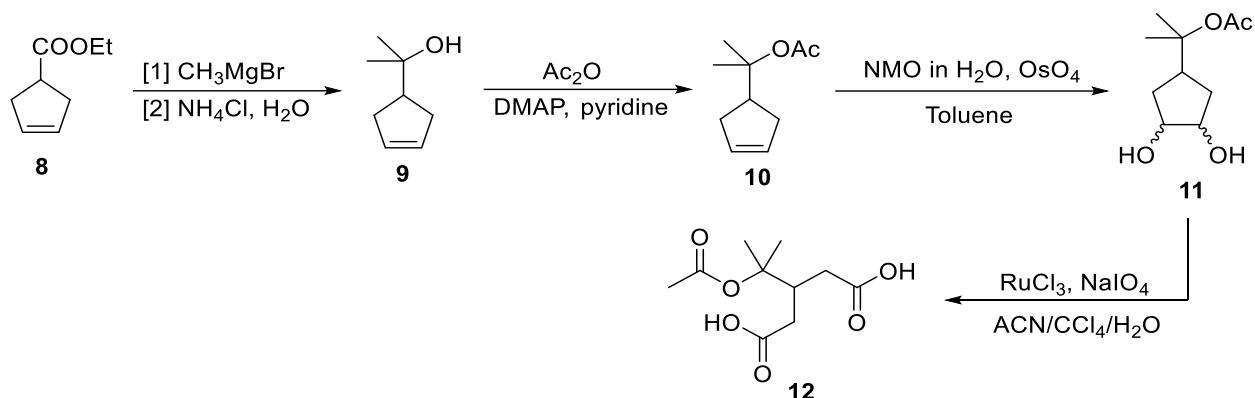

A methyl magnesium bromide solution (6 mL, 3.0 M in diethyl ether) was added dropwise to a solution of ethyl cyclopent-3-en-1-carboxylate (**8**) (0.76 g, 6 mmol) in diethyl ether (10 mL) at 0 °C. After the resulting mixture was stirred for 2 h at 45 °C, a saturated  $\text{NH}_4\text{Cl}$  aqueous solution (20 mL) was slowly added into the mixture. The reaction mixture was extracted with ethyl acetate (3 times x 20 mL), dried over  $\text{Na}_2\text{SO}_4$ , evaporated, and distilled under reduced pressure to yield tertiary alcohol **9** (bp 79-81 °C/35 mmHg, 0.62 g, 81%). **2-(Cyclopent-3-en-1-yl)propan-2-ol (9)**.  $^1\text{H}$  NMR (500 MHz,  $\text{CDCl}_3$ )  $\delta$  1.19 (s, 6H), 1.46 (s, 1H), 2.22-2.29 (m, 2H), 2.34-2.42 (m, 3H), 5.66 (s, 2H).  $^{13}\text{C}$  NMR (125 MHz,  $\text{CDCl}_3$ )  $\delta$  27.70, 34.11, 48.72, 72.28, 129.93.

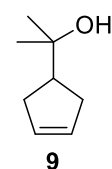

**2-(Cyclopent-3-en-1-yl)propan-2-ol**

4-Dimethylaminopyridine (DMAP) (0.06 g, 0.49 mmol) was added to a solution of tertiary alcohol **9** (0.62 g, 4.9 mmol) in pyridine (20 mmol) and acetic anhydride (20 mmol), and then stirred overnight at room temperature. The excess acetic anhydride was destroyed by the addition of methanol (5 mL) and the mixture was neutralized by a 1 M aqueous HCl solution. The resulting mixture was extracted with diethyl ether (3 times x 20 mL) and dried over  $\text{Na}_2\text{SO}_4$ . Removal of the solvent left behind a crude mixture, which was separated by vacuum distillation to yield acetate **10** (0.62 g, 76%, bp 84-87 °C/20 mmHg). **2-(Cyclopent-3-en-1-yl)propan-2-yl acetate (10)**.  $^1\text{H}$  NMR (500 MHz,  $\text{CDCl}_3$ )  $\delta$  1.45 (s, 6H), 1.97 (s, 3H), 2.22-2.28 (m, 2H), 2.33-2.40 (m, 2H), 2.70-2.76 (m, 1H), 5.64-5.67 (m, 2H).  $^{13}\text{C}$

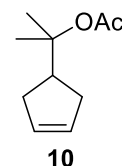

**2-(Cyclopent-3-en-1-yl)propan-2-yl acetate**

NMR (125 MHz, CDCl<sub>3</sub>)  $\delta$  22.5, 23.6, 33.9, 47.4, 84.0, 129.8, 170.6.

To the stirred dispersion of acetate **10** (0.62 g, 3.7 mmol) in 20 mL distilled water, *m*CPBA (0.71 g, 4.1 mmol) was slowly added over 10 min at 0 °C. After the reaction mixture was stirred for 30 min at room temperature, a 10% aqueous H<sub>2</sub>SO<sub>4</sub> solution (0.7 mL) was added to the mixture. Additional stirring of the mixture for 2 h at room temperature was followed by adding solid NaOH until the mixture became limpid. The mixture was quenched with a saturated aqueous NaCl solution (15

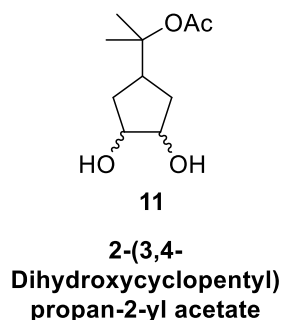

mL) and extracted with dichloromethane (3 times x 30 mL). Drying the organic phase over Na<sub>2</sub>SO<sub>4</sub> and removal of the solvent gave diol **11** (0.49 g, 65%), which was used in the next step without further purification. **2-(3,4-Dihydroxycyclopentyl)propan-2-yl acetate (11)**. <sup>1</sup>H NMR (500 MHz, CDCl<sub>3</sub>)  $\delta$  1.44 (s, 6H), 1.75-1.78 (m, 4H), 1.96 (s, 3H), 2.62 (q, *J* = 8.8 Hz, 1H), 3.15 (br s, 2H), 4.11-4.12 (m, 2H). <sup>13</sup>C NMR (125 MHz, CDCl<sub>3</sub>)  $\delta$  22.4, 23.8, 32.6, 45.6, 74.0, 83.5, 170.8.

To a strongly stirred solution of diol **11** (0.69 g, 3.4 mmol) in acetonitrile/CCl<sub>4</sub>/H<sub>2</sub>O (2:2:3, 40 mL), NaIO<sub>4</sub> (2.97 g, 13.9 mmol) was added. The mixture was stirred for 10 min at room temperature. After adding RuCl<sub>3</sub> · xH<sub>2</sub>O (0.016 g, 0.075 mmol) to the mixture and stirring

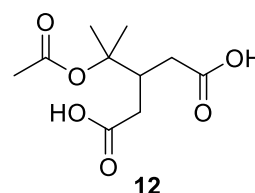

for an additional 2 h at room temperature, the reaction mixture was diluted with water, extracted with dichloromethane (3 times x 40 mL), and dried over Na<sub>2</sub>SO<sub>4</sub>. Removal of the solvent left behind a crude mixture, which was filtered through a short pad of celite using diethyl ether. Purification by recrystallization (hexane/diethyl ether) gave DTAA **12** (0.55 g, 70%). **3-(2-Acetoxypentan-2-yl)pentanedioic acid (DTAA) (12)**. Mp 166-167 °C. <sup>1</sup>H NMR (500 MHz, DMSO)  $\delta$  1.38 (s, 6H), 1.88 (s, 3H), 2.13 (dd, *J* = 15.9 and 7.4 Hz, 2H), 2.37 (dd, *J* = 15.9 and 5.6 Hz, 2H), 2.73-2.80 (m, 1H), 12.11 (br s, 2H). <sup>13</sup>C NMR (125 MHz, CDCl<sub>3</sub>)  $\delta$  22.0, 23.0, 35.0, 40.5, 83.2, 169.5, 173.7.

**3-(2-Acetoxypentan-2-yl)pentanedioic acid**

## Procedure B <sup>7</sup>

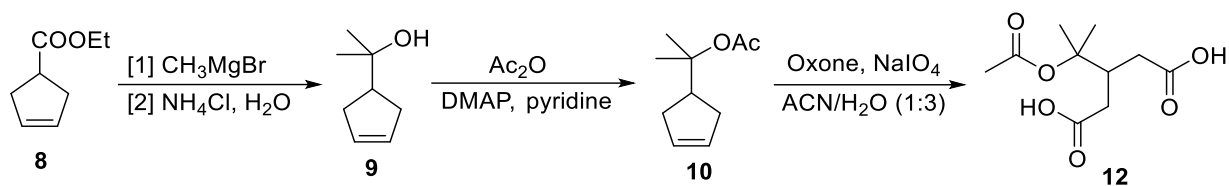

To a stirred solution of acetate **10** (0.5 g, 3.0 mmol) in acetonitrile/ $\text{H}_2\text{O}$  (1:3, 20 mL), oxone (1.84 g, 6 mmol) and sodium periodate (0.96 g, 4.5 mmol) were added. The reaction mixture was vigorously stirred for 24 h at room temperature. The mixture was filtered, extracted with diethyl ether (20 mL x 3 times), and dried over  $\text{Na}_2\text{SO}_4$ . Evaporation of the solvent left behind a crude mixture, which was purified by recrystallization (hexane/diethyl ether) to give DTAA **12** (0.54 g, 77%).

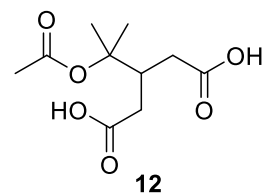

**3-(2-Acetoxypropan-2-yl)pentanedioic acid**

**Synthesis of sodium (1*R*,2*R*,3*S*,5*R*)-2-hydroxy-2,6,6-trimethylbicyclo[3.1.1]heptan-3-yl sulfate (15)**<sup>8-11</sup>

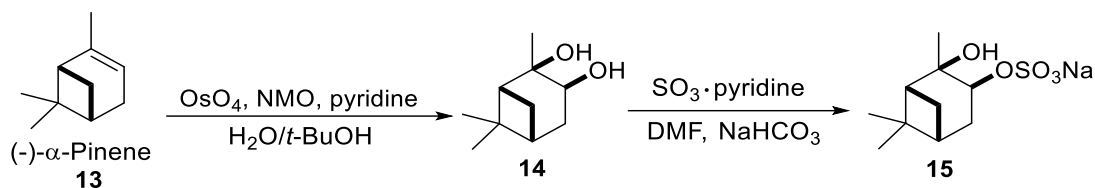

To (-)-α-pinene **13** (1.36 g, 10 mmol) in a 50 mL round-bottom flask was added 4-methylmorpholine-N-oxide (1.76 g, 15 mmol) and pyridine (0.78 mL) in a mixture of water (3.1 mL) and *t*-BuOH (15.4 mL). After adding a solution of OsO<sub>4</sub> (0.34 mL, 2.5% in *t*-BuOH) to the mixture, it was heated for 48 h at reflux. Then, the mixture was quenched with a saturated aqueous solution of NaHSO<sub>3</sub> (35 mL) and stirred for 30 min at room temperature. The mixture was extracted with dichloromethane (3 times x 50 mL), dried over Na<sub>2</sub>SO<sub>4</sub>, and purified by column chromatography using hexane/ethyl acetate (1:8) to yield diol **14** (1.46 g, 85%). **(1*R*,2*R*,3*S*,5*R*)-2,6,6-Trimethylbicyclo[3.1.1]heptane-2,3-diol (14)**. Mp 55-56 °C (52-54 °C<sup>4d</sup>). <sup>1</sup>H NMR (500 MHz, CDCl<sub>3</sub>) δ 0.94 (s, 3H), 1.27 (s, 3H), 1.31 (s, 3H), 1.37 (d, *J* = 10.4 Hz, 1H), 1.64 (ddd, *J* = 2.2, 4.8 and 13.9 Hz, 1H), 1.91-1.94 (m, 1H), 2.01 (t, *J* = 5.8 Hz, 1H), 2.18-2.23 (m, 1H), 2.43-2.63 (m, 1H), 4.00 (dd, *J* = 4.8 and 7.7 Hz, 1H).

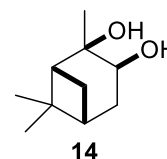

**(1*R*,2*R*,3*S*,5*R*)-2,6,6-Trimethylbicyclo[3.1.1]heptane-2,3-diol**

To the dissolved solution of diol **14** (0.90 g, 5 mmol) in dimethylformamide (5 mL) was added SO<sub>3</sub>-Py (0.80 g, 5 mmol). After the mixture was stirred for 4 h at room temperature, NaHCO<sub>3</sub> (0.84 g, 10 mmol) was added to the mixture. The resulting mixture was further stirred for 12 h at 50 °C. Removal of the solvent under reduced pressure left behind a crude mixture that was purified by column chromatography using gradient eluents (hexane/ethyl acetate = 2:1 to dichloromethane/methanol = 15:1) to give organosulfate **15** (1.23 g, 90%) as a white solid. **Sodium (1*R*,2*R*,3*S*,5*R*)-2-hydroxy-2,6,6-trimethylbicyclo[3.1.1]heptan-3-yl sulfate (15)**. Mp >300 °C. <sup>1</sup>H NMR (500 MHz, CD<sub>3</sub>OD) δ 1.00 (s, 3H), 1.29 (s, 3H), 1.37 (s, 3H), 1.55 (d, *J* = 10.3 Hz, 1H), 1.87-1.96 (m, 3H), 2.16-2.21 (m, 1H), 2.51-2.56 (m, 1H), 4.74 (dd, *J* = 5.8 and 9.8 Hz, 1H). <sup>13</sup>C NMR (125 MHz, CD<sub>3</sub>OD) δ 24.6, 28.4, 29.2, 30.1, 36.7, 39.5, 41.8, 55.4, 75.1, 77.5

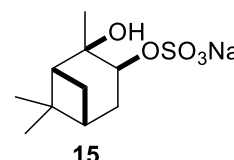

**Sodium (1*R*,2*R*,3*S*,5*R*)-2-hydroxy-2,6,6-trimethylbicyclo[3.1.1]heptan-3-yl sulfate**

## $^1\text{H}$ and $^{13}\text{C}$ NMR Spectra of Synthesized SOA Constituents

$^1\text{H}$  (500 MHz) and  $^{13}\text{C}$  NMR (125 MHz) spectra were recorded on a Bruker Avance Digital 500 spectrometer using TMS as an internal standard in  $\text{CDCl}_3$ , MeOD, or  $\text{DMSO}-d_6$ .

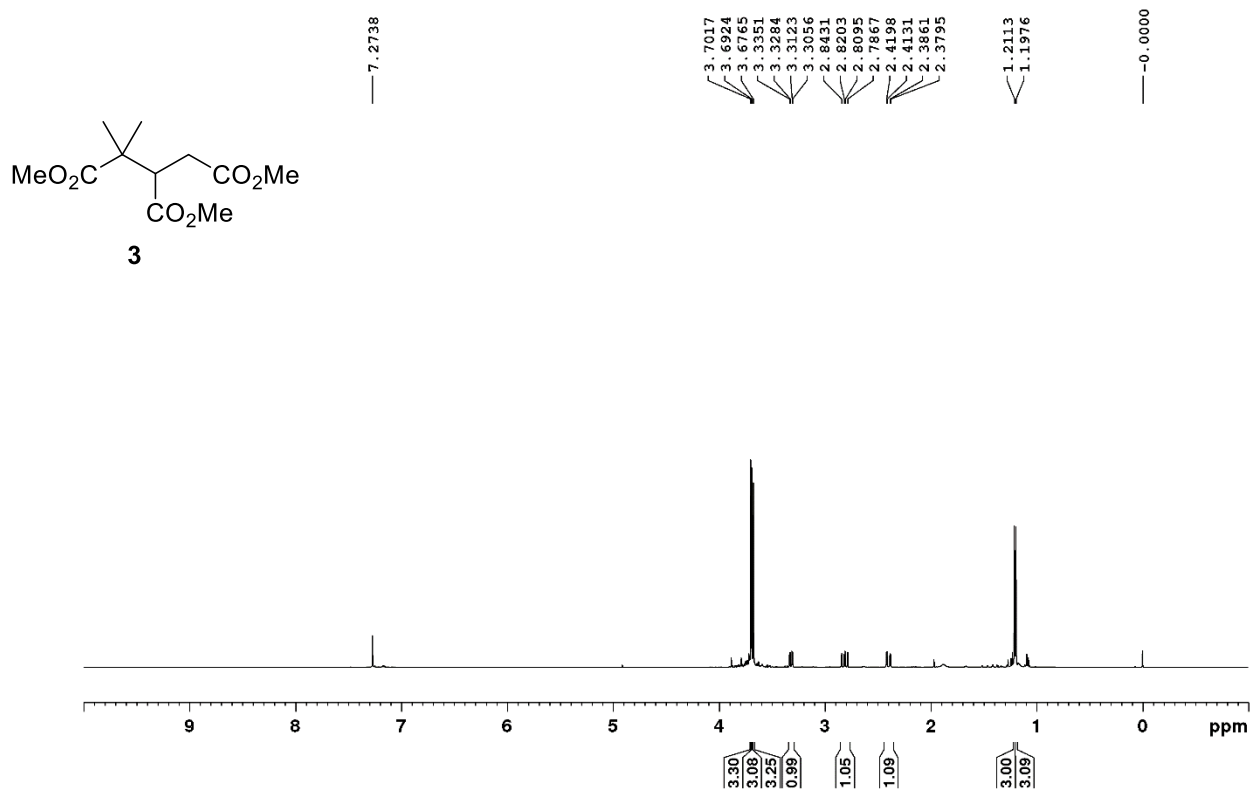



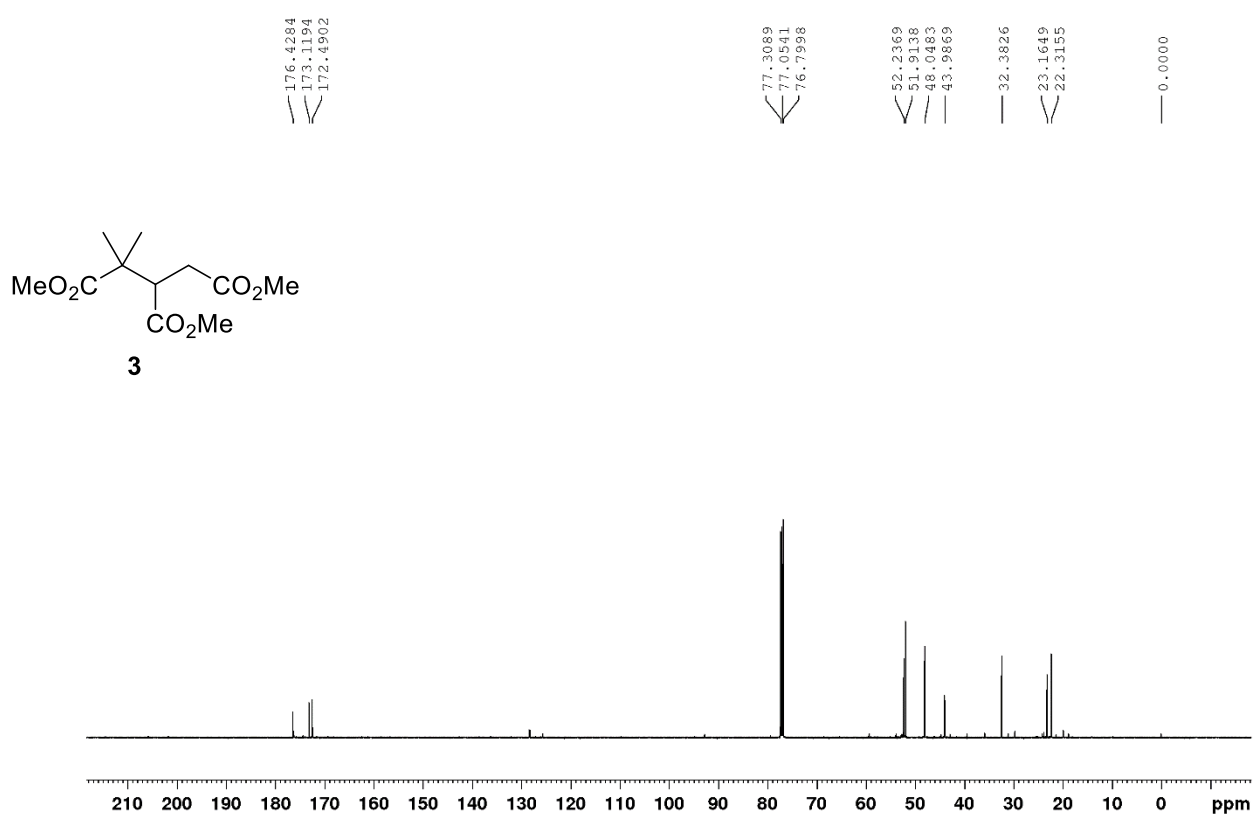

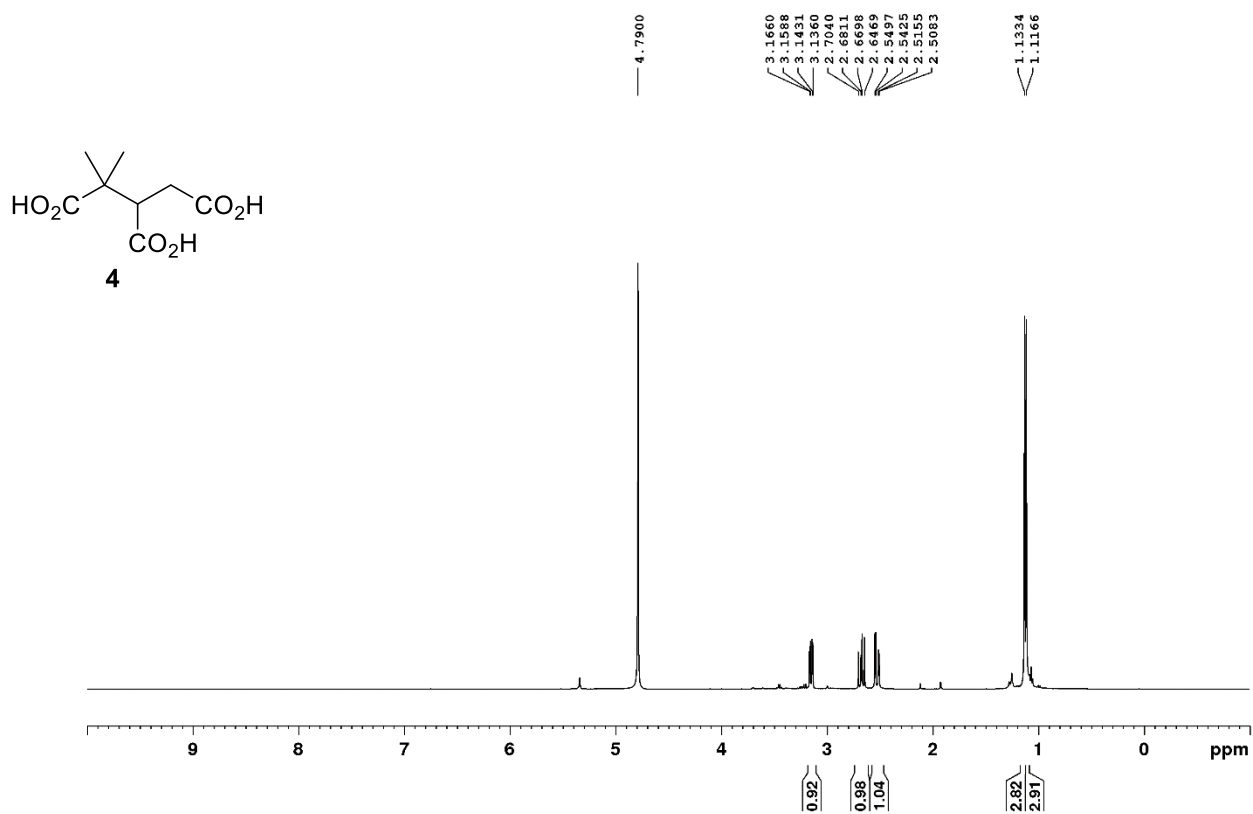

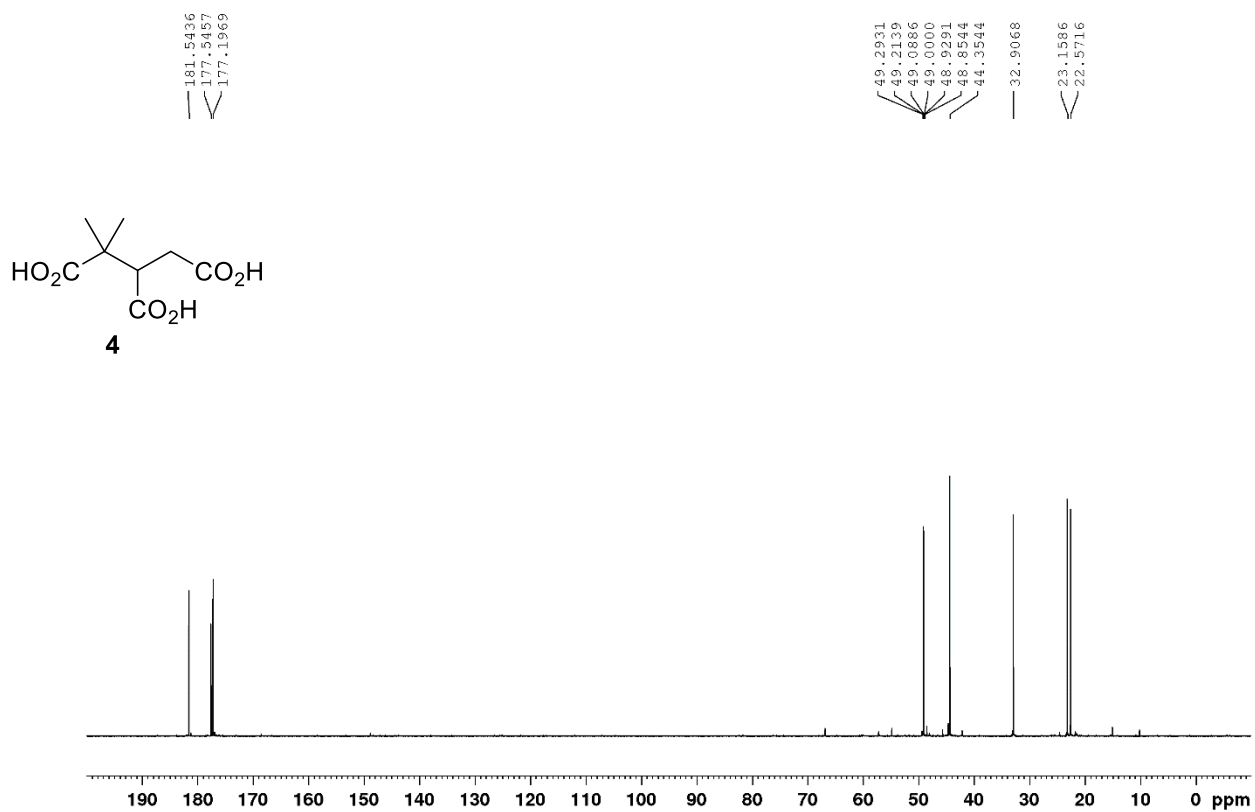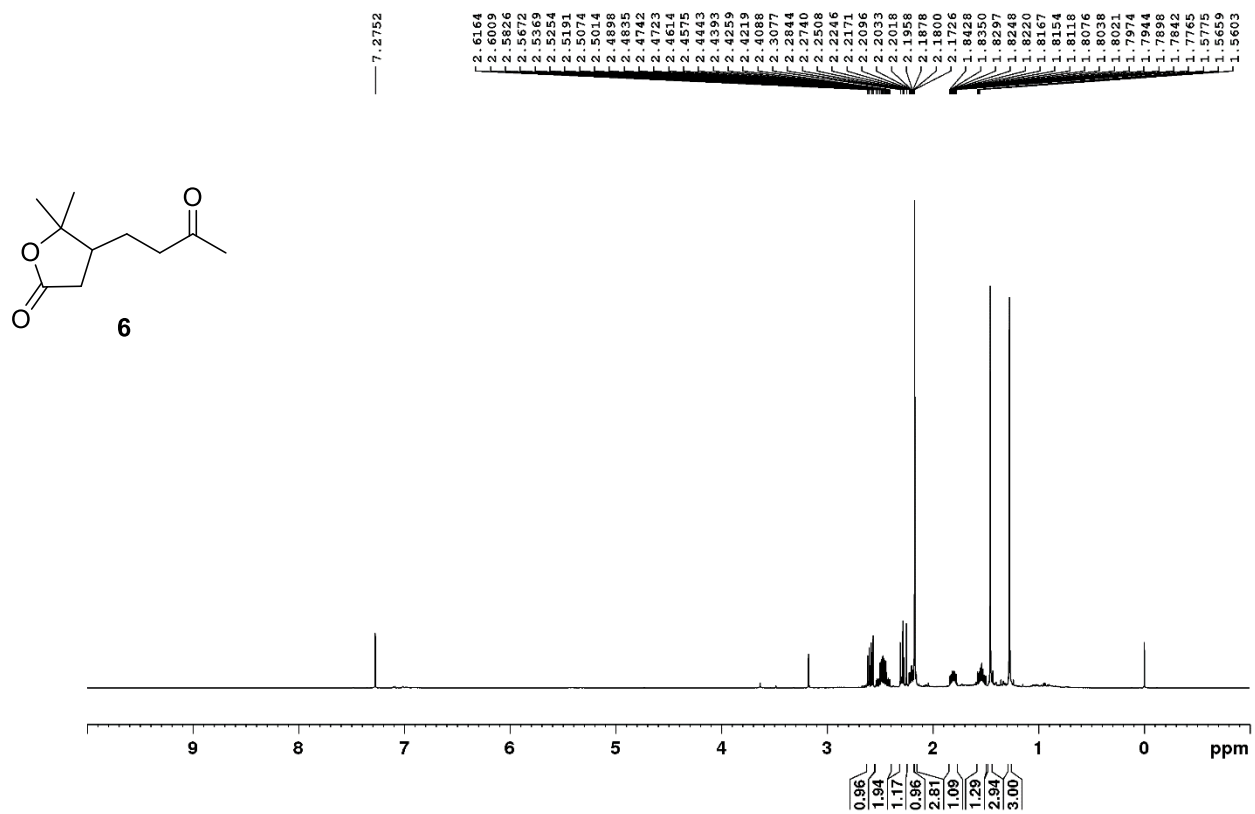

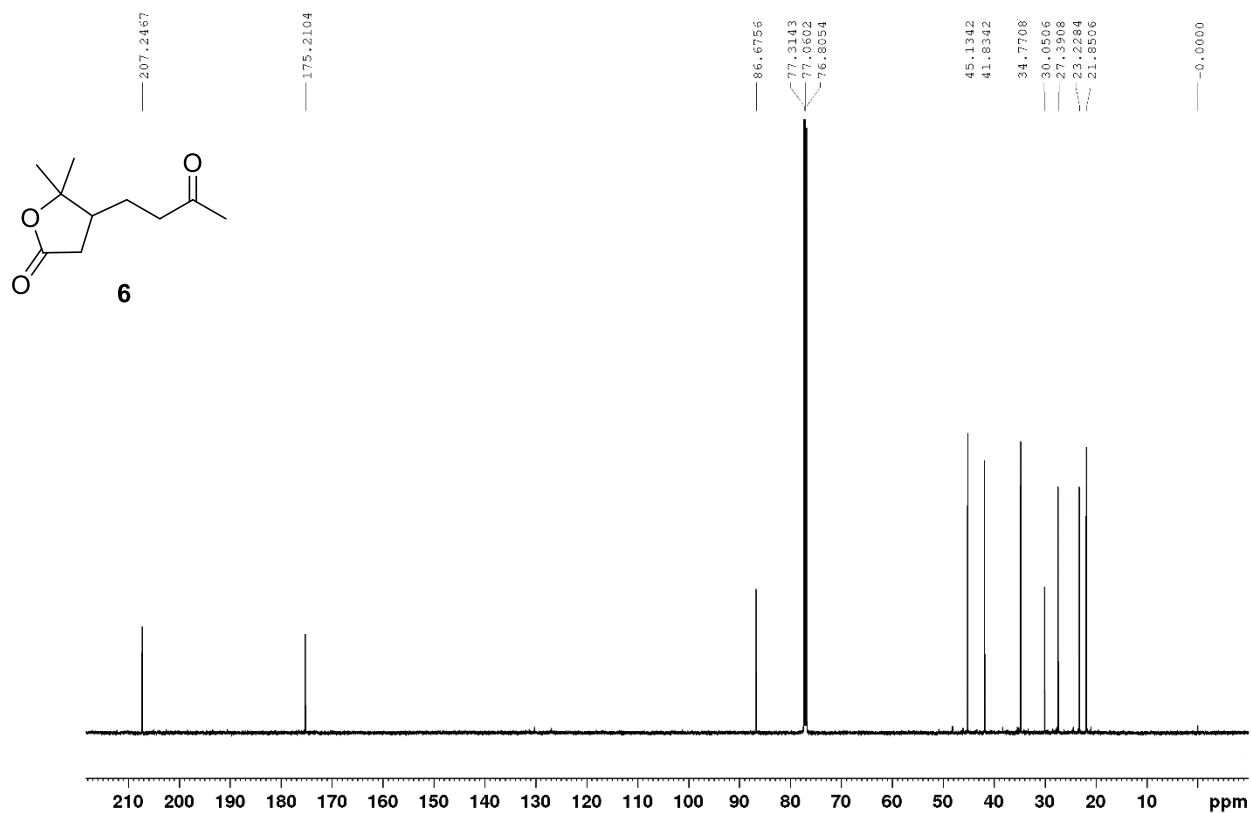

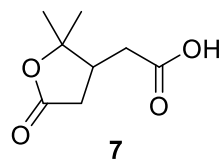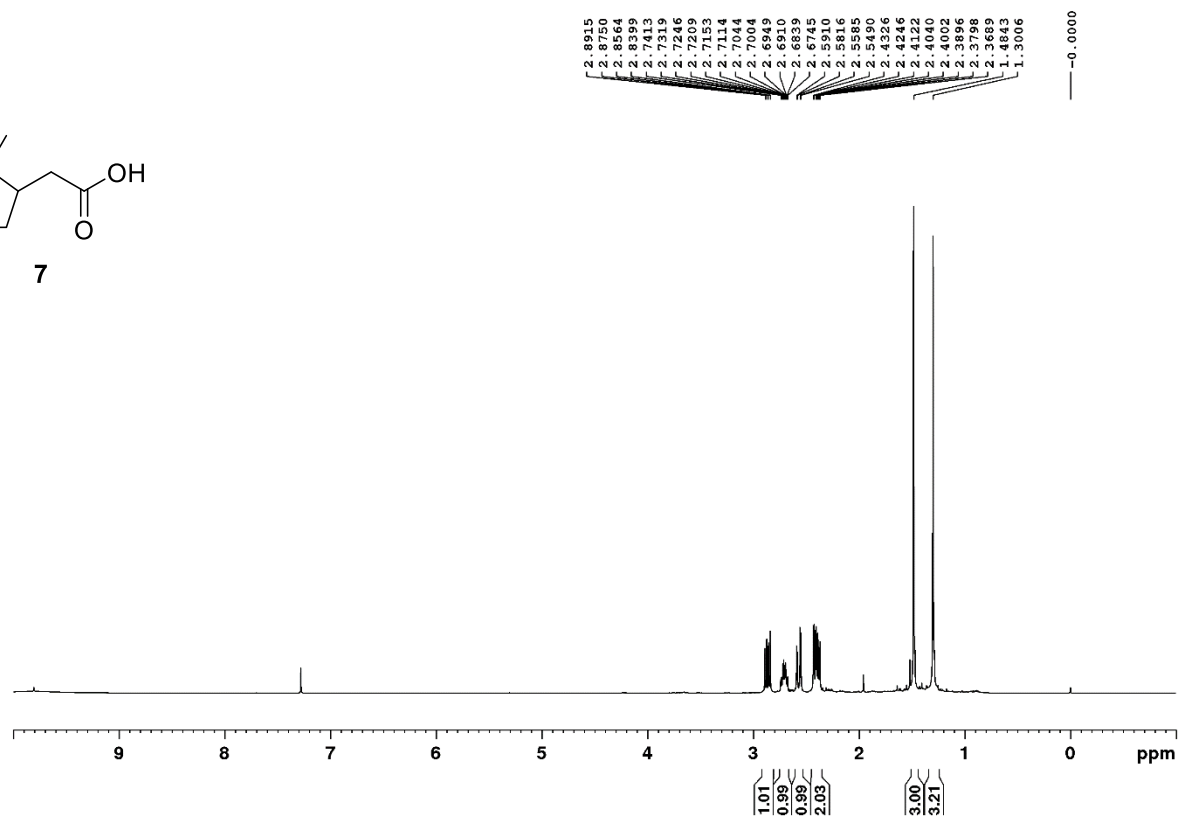

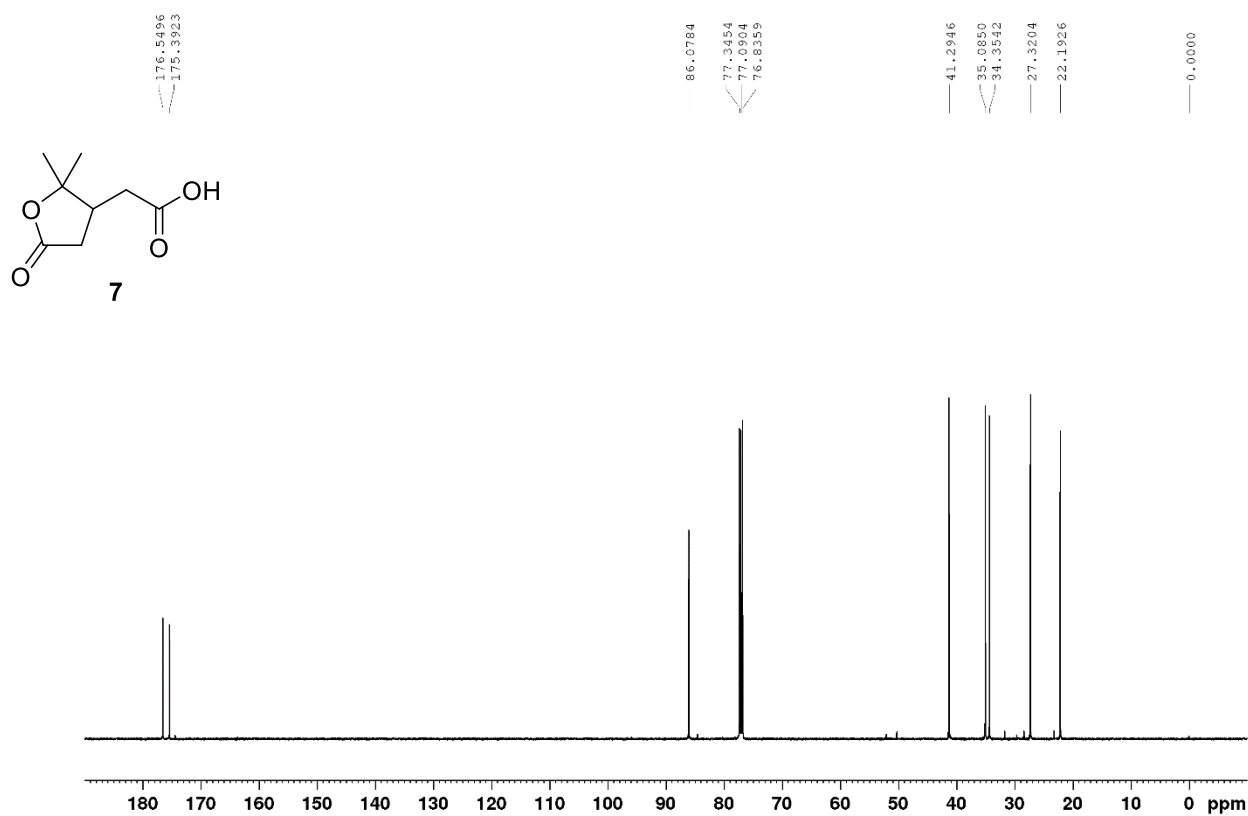

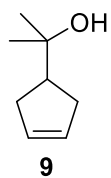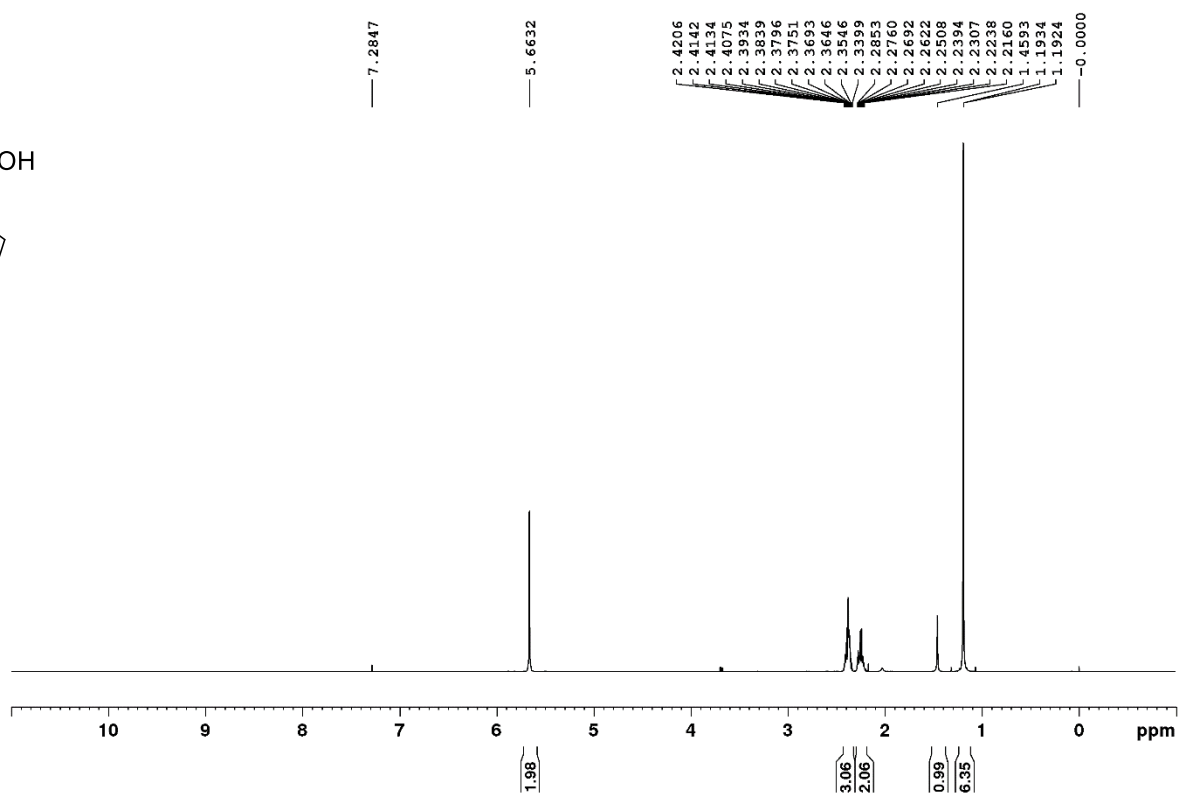

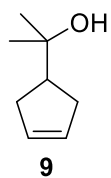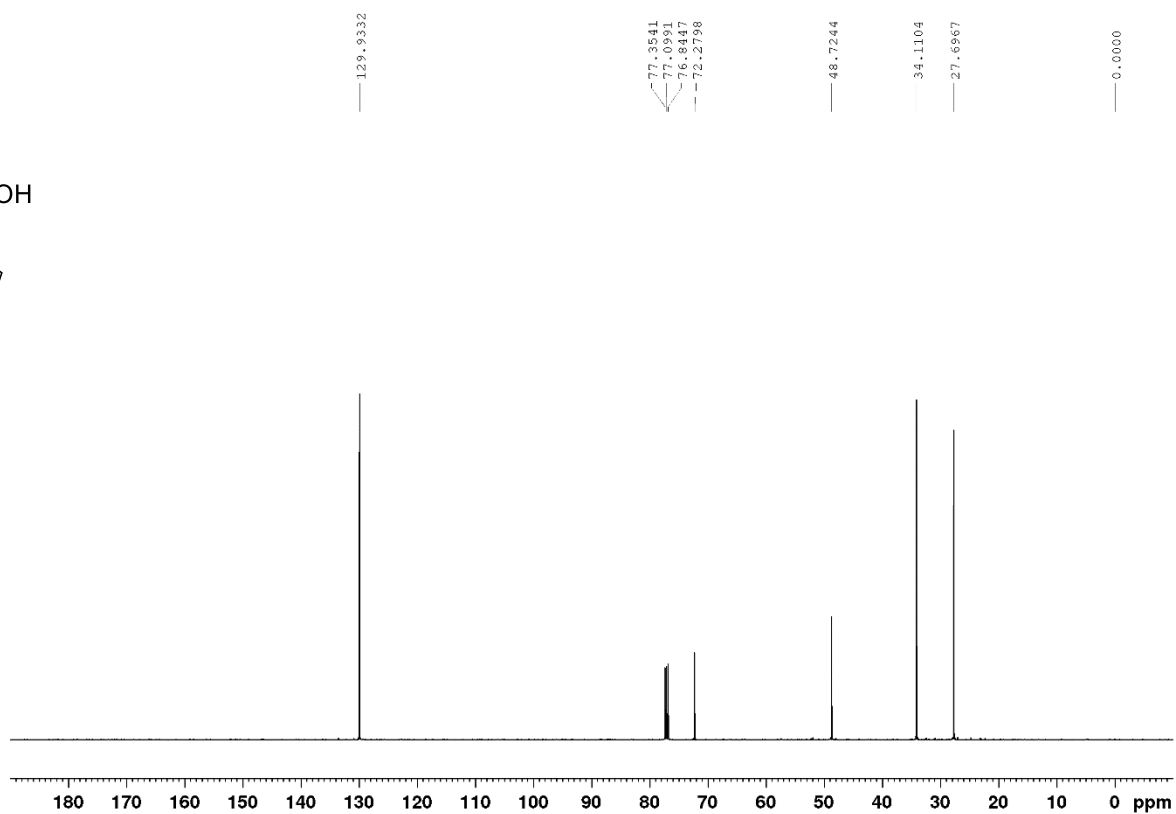



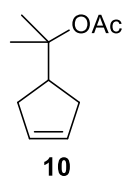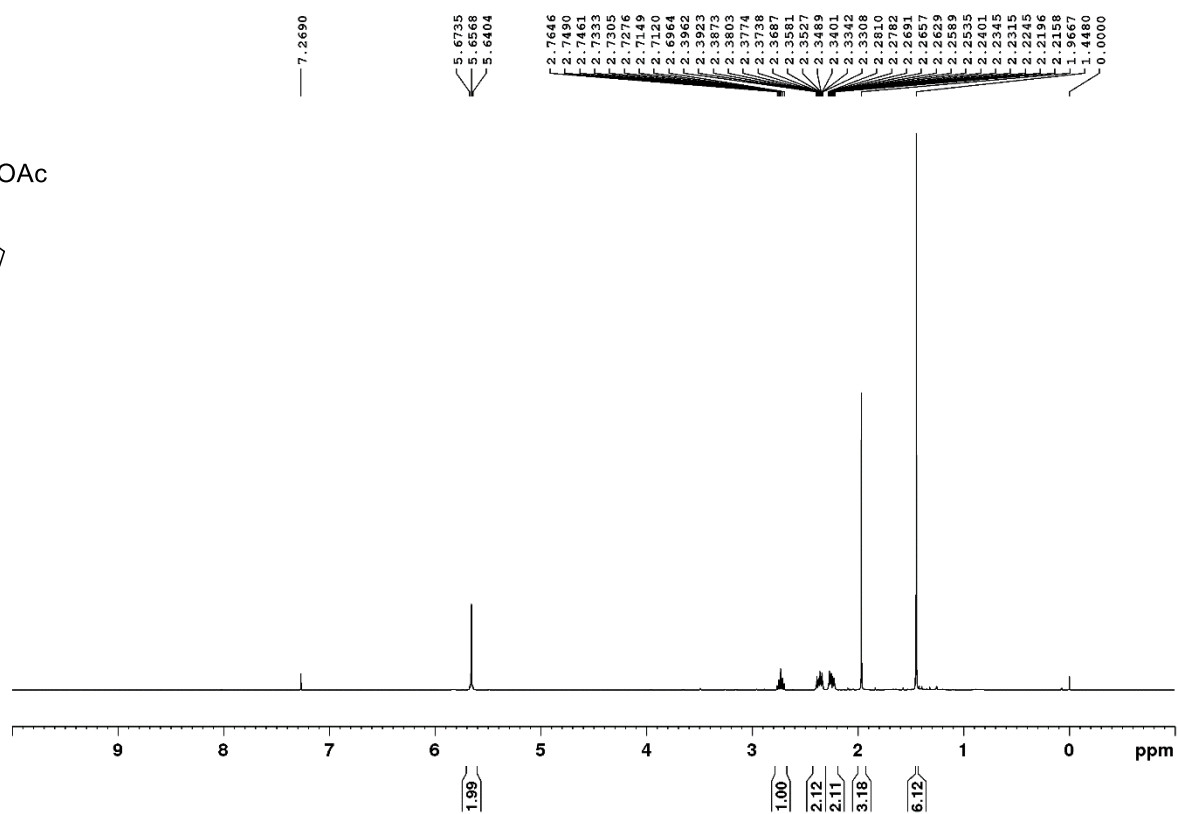

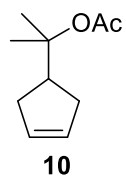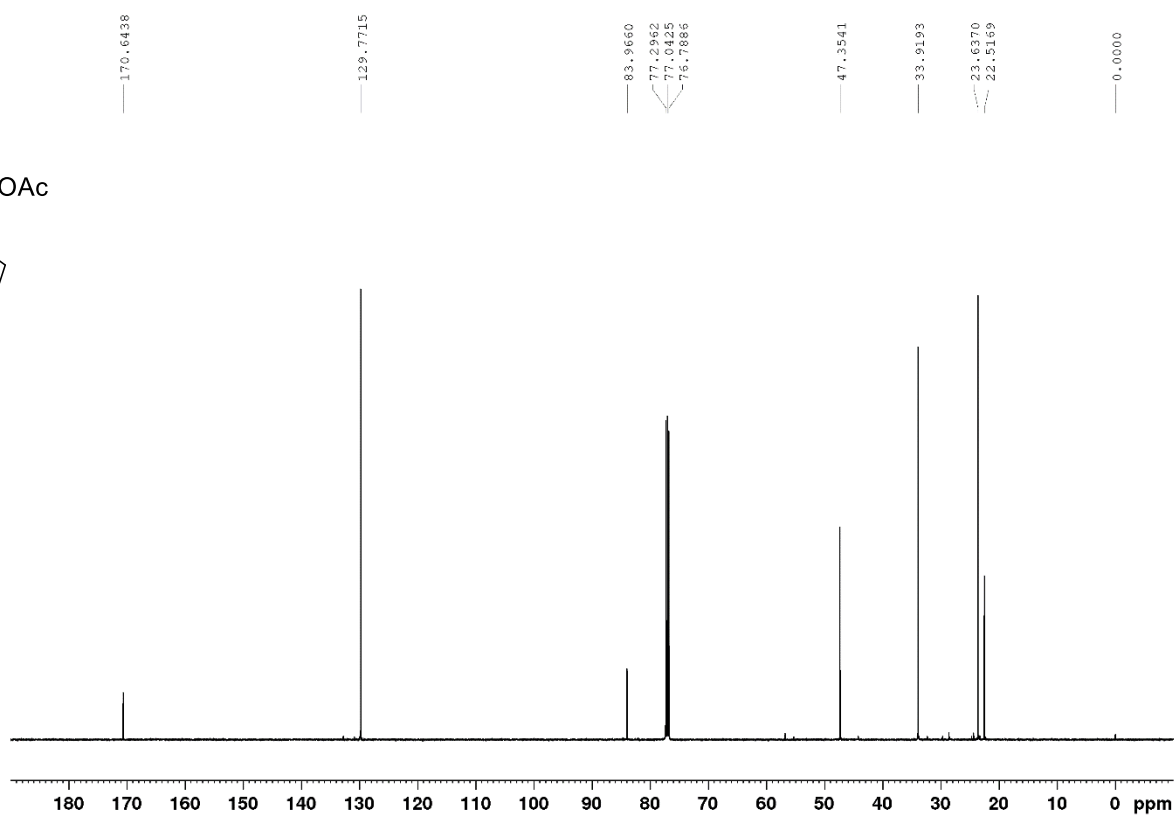

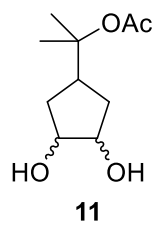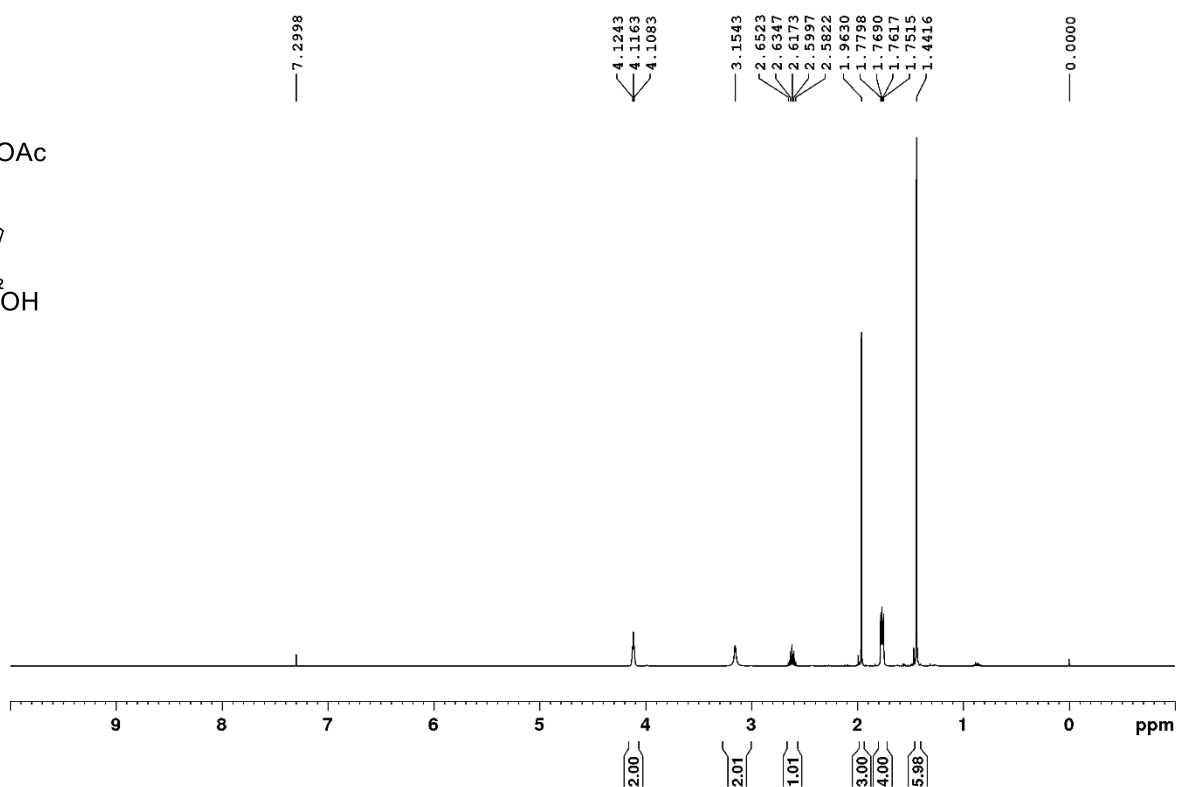

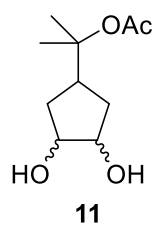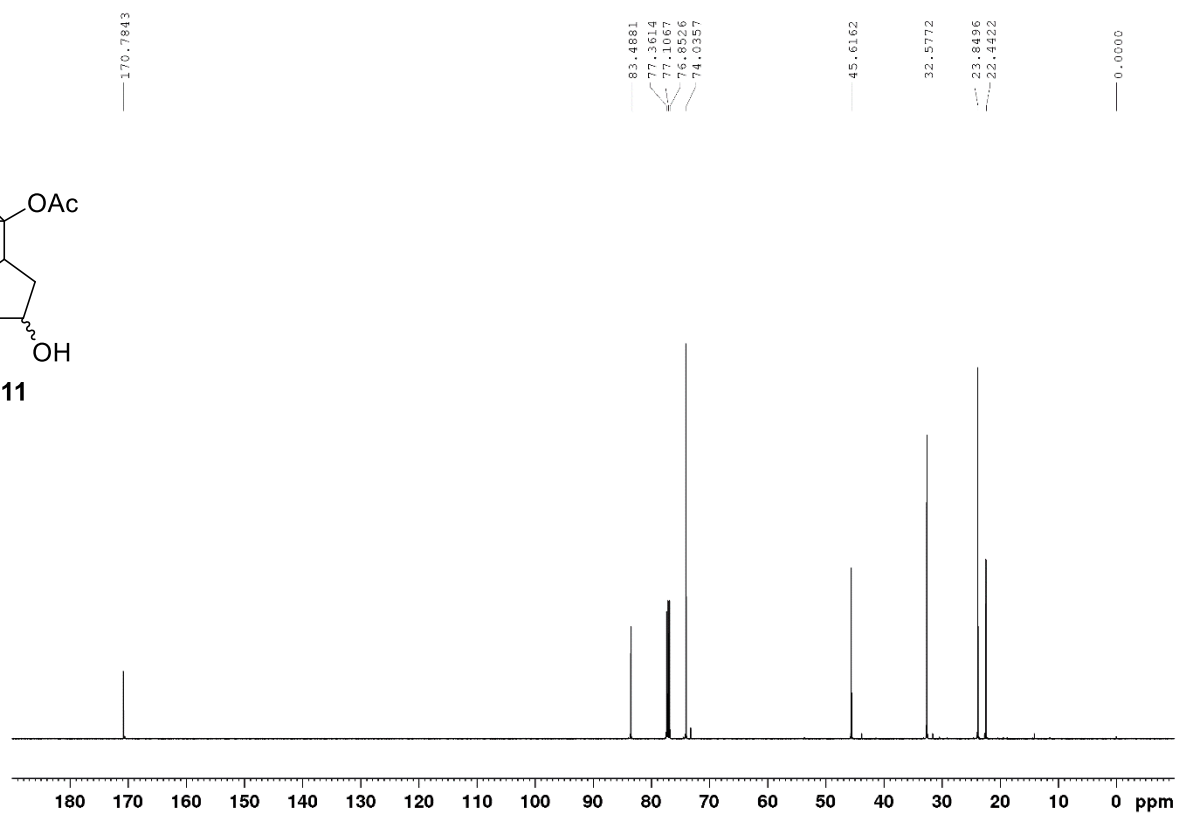

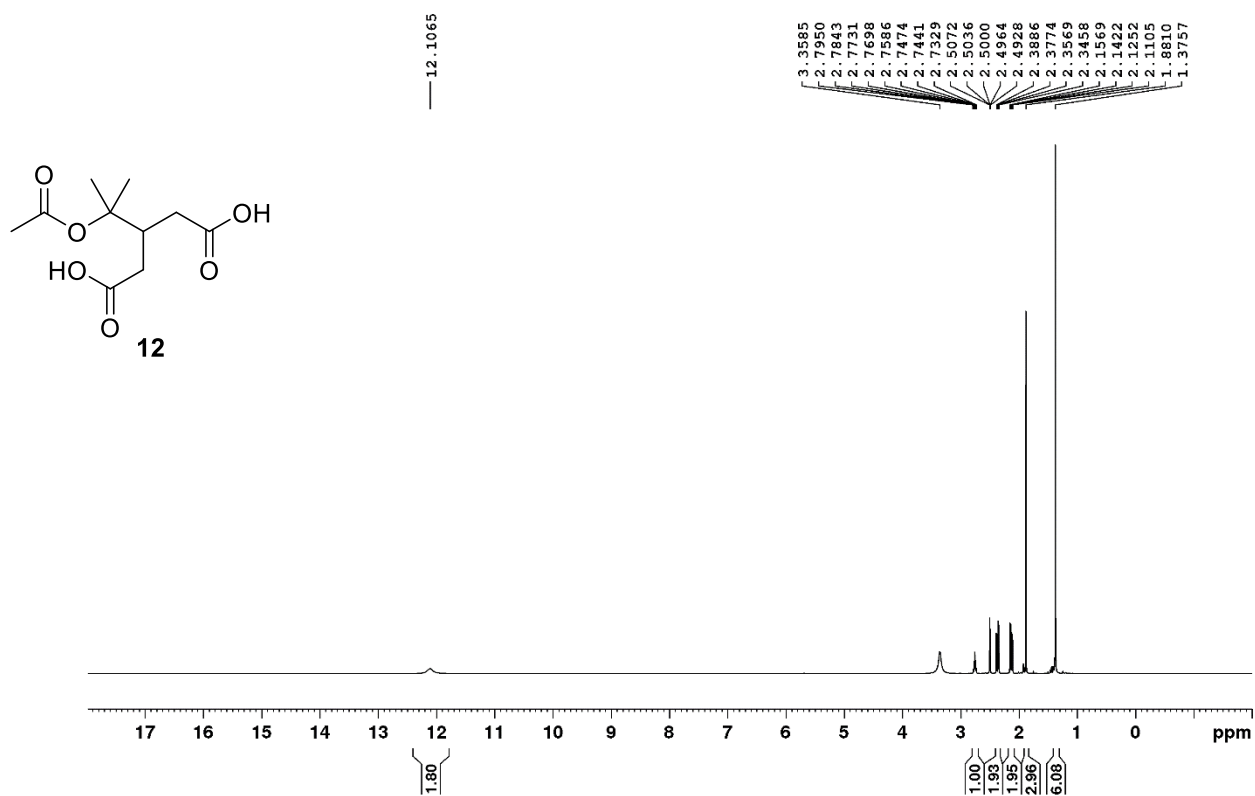

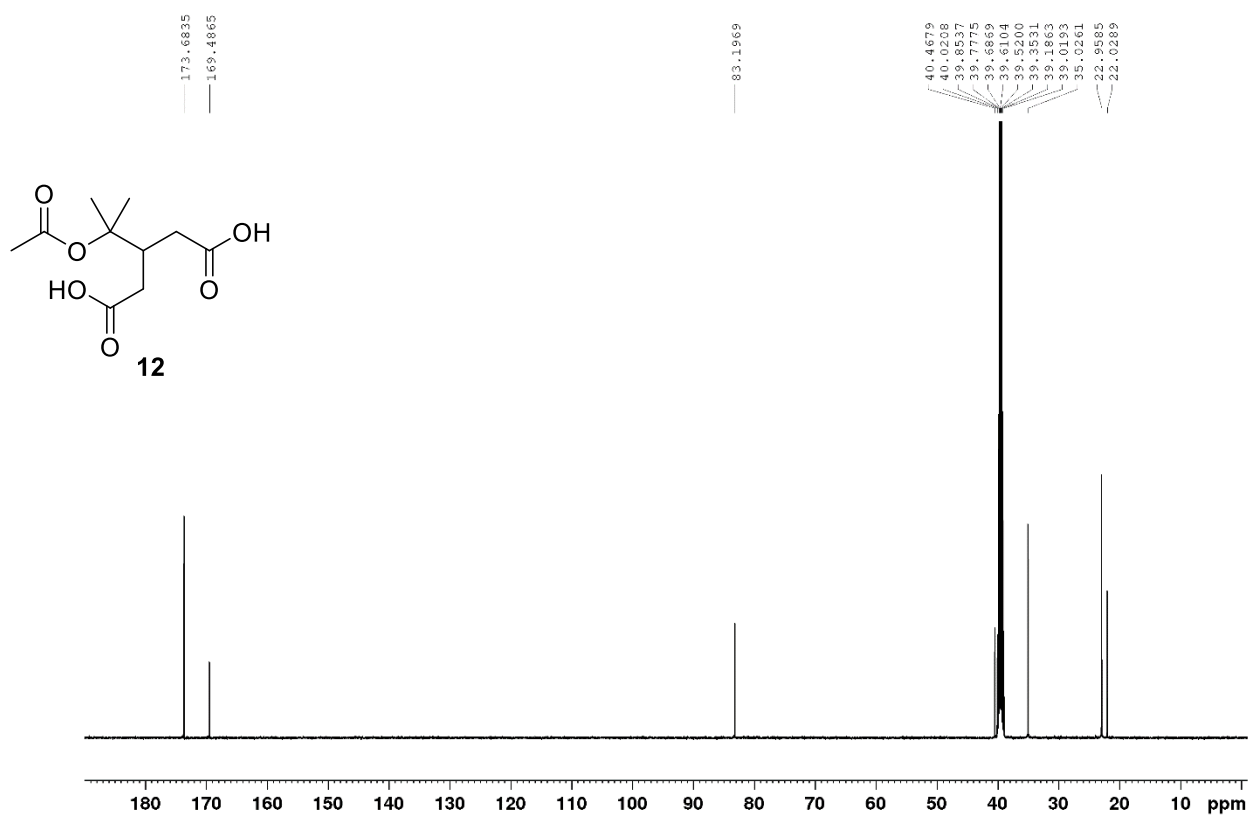

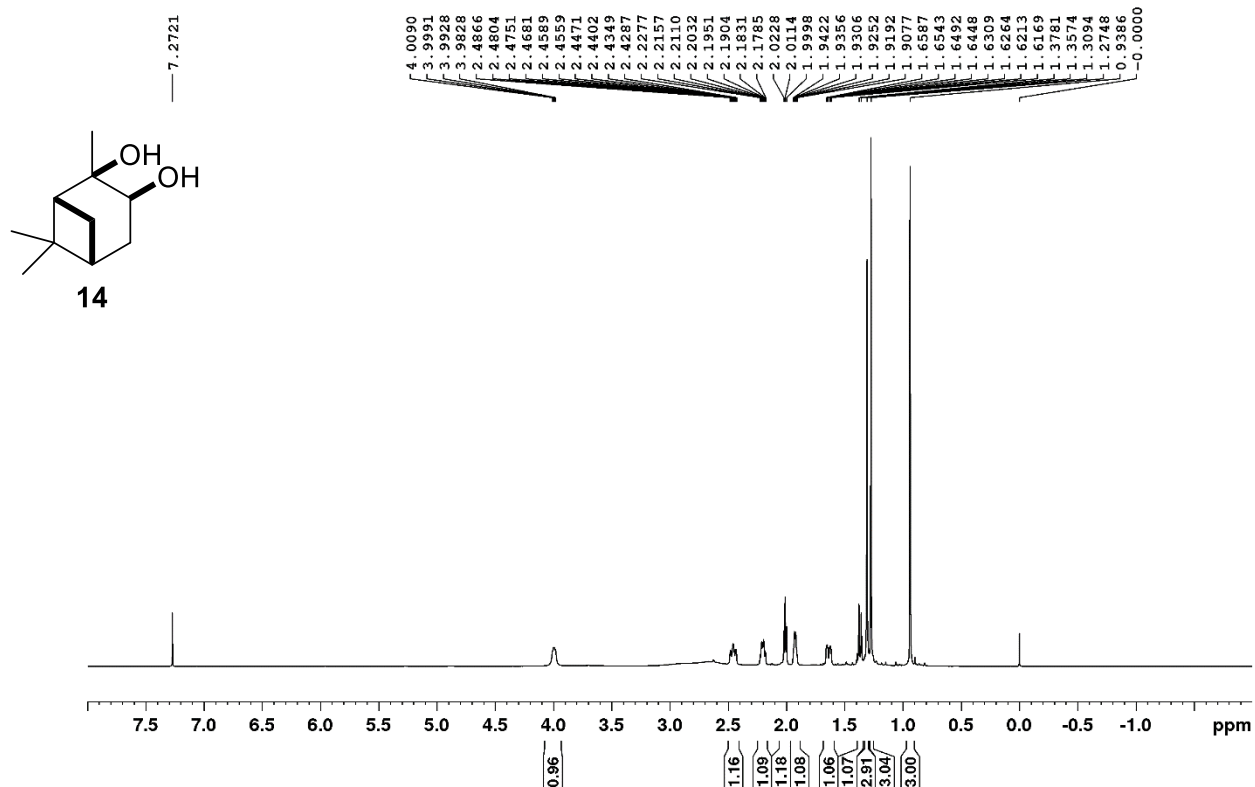

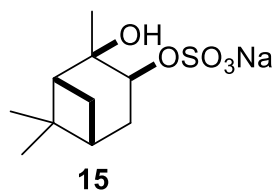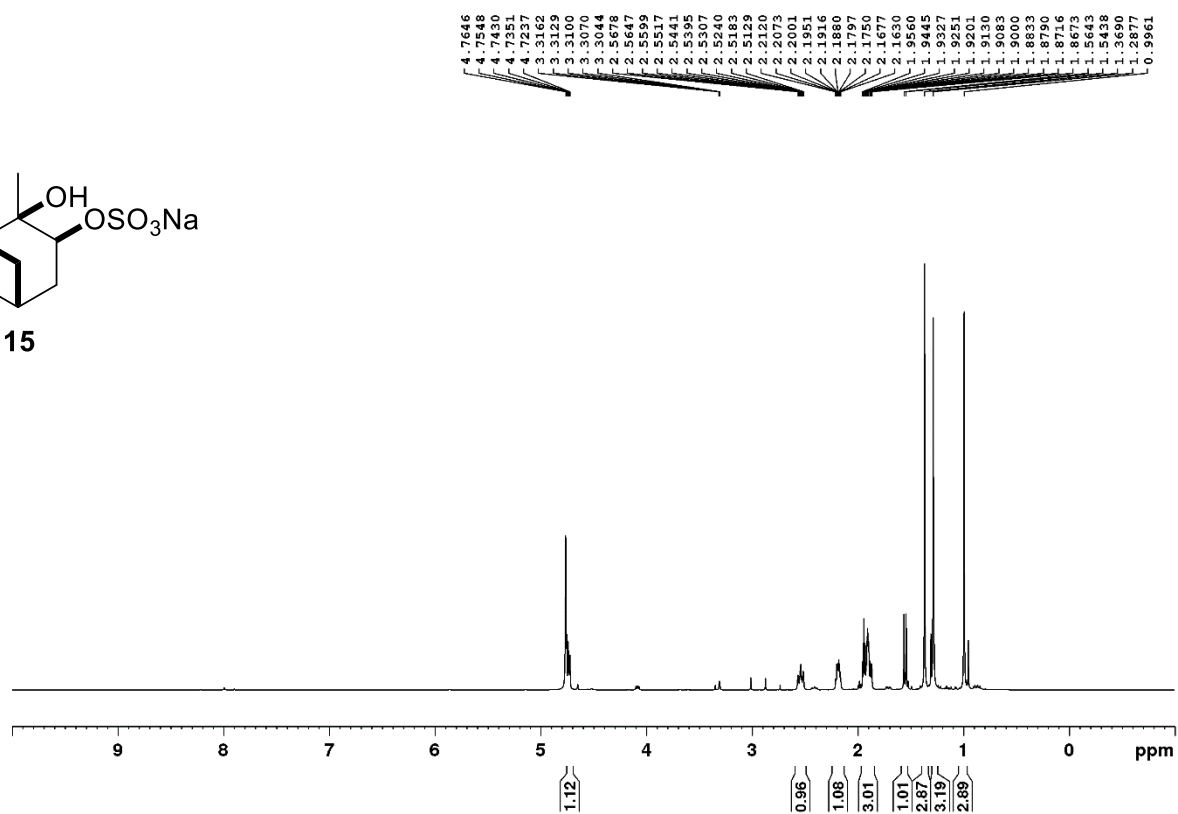



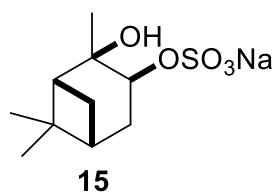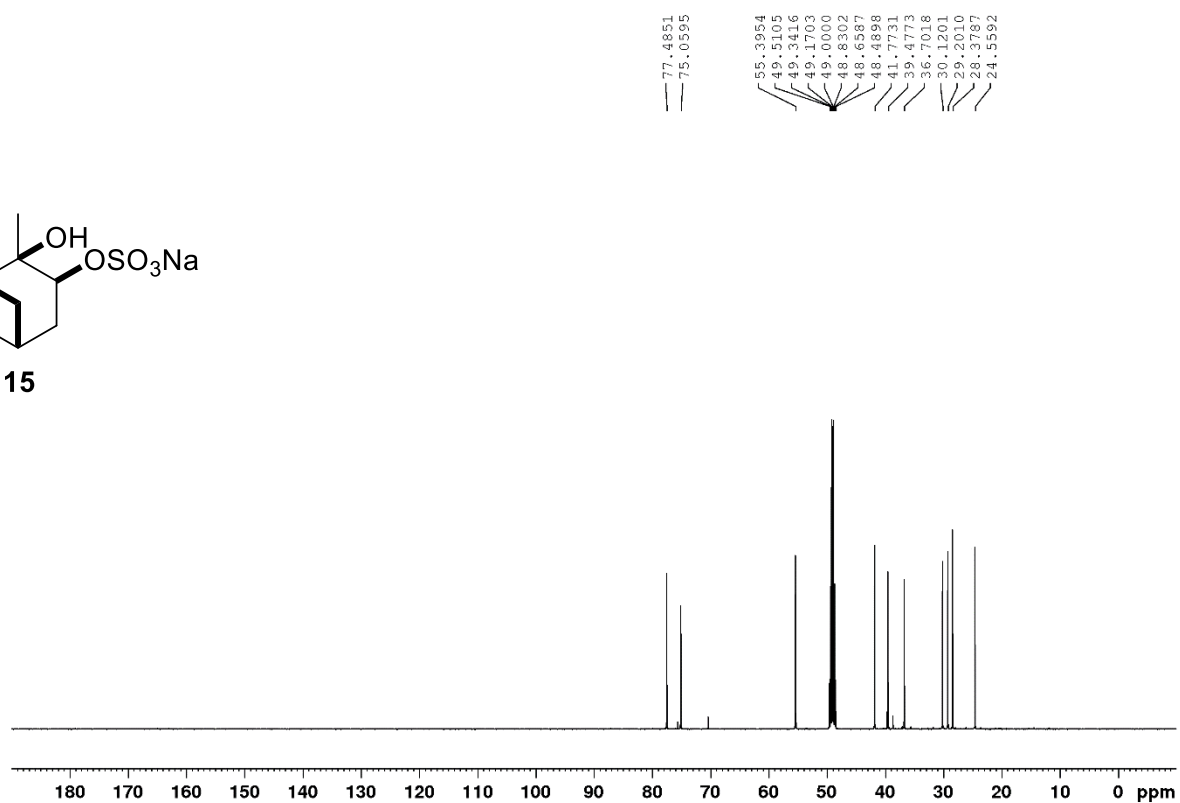

## Particle Transmission Efficiencies of Thermal Denuder

The particle size distribution and size-resolved particle transmission efficiencies at set temperatures of 25 °C, 40 °C, 60 °C, and 100 °C with an effective RT of 60 s are demonstrated in Figs. S1 (a) and (b). In general, no substantial change in sized-resolved particle number concentration was perceived at aforementioned set temperatures. The particle transmission efficiencies remained the same for particles larger than 25 nm, as large particles possess small diffusivities. Regardless of the set temperature, particles smaller than 25 nm exhibited lower transmission efficiencies than particles larger than 25 nm which might be due to diffusional losses inside the heating section of thermal denuder. Similar observations were also noted in other studies.<sup>12–14</sup>

The particle size distribution and transmission efficiency at the effective RTs of 60 s and 70 s and a set temperature of 100 °C are demonstrated in Figs. S1 (c) and (d). The particle size distribution and sized-resolved transmission efficiency were nearly same at effective RTs of 60 s and 70 s.

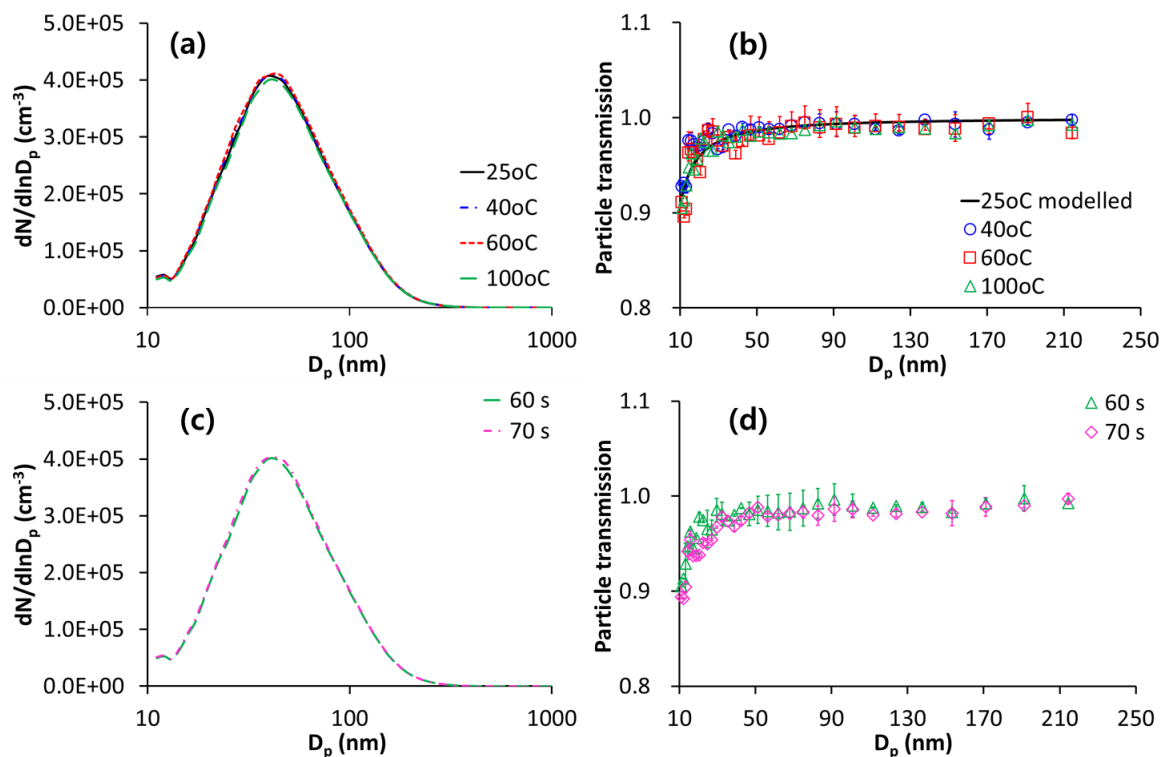

**Fig. S1.** For NaCl at set temperatures of 25°C, 40°C, 60°C, and 100°C and effective RT of 60 s, (a) particle size distribution and (b) size-resolved particle transmission efficiency. Theoretical diffusional losses of particles at reference temperature of 25 °C is represented by solid line. For NaCl at effective RTs of 60 s and 70 s and set temperature of 100°C, (c) particle size distribution and (d) size-resolved particle transmission efficiency.

## References

- (1) Dette, H. P.; Qi, M.; Schröder, D. C.; Godt, A.; Koop, T. Glass-Forming Properties of 3-Methylbutane-1,2,3-Tricarboxylic Acid and Its Mixtures with Water and Pinonic Acid. *Journal of Physical Chemistry A* **2014**, *118* (34), 7024–7033. <https://doi.org/10.1021/jp505910w>.
- (2) Claeys, M.; Iinuma, Y.; Szmigielski, R.; Surratt, J. D.; Blockhuys, F.; Van Alsenoy, C.; Böge, O.; Sierau, B.; Gómez-González, Y.; Vermeylen, R.; Van Der Veken, P.; Shahgholi, M.; Chan, A. W. H.; Herrmann, H.; Seinfeld, J. H.; Maenhaut, W. Terpenylic Acid and Related Compounds from the Oxidation of  $\alpha$ -Pinene: Implications for New Particle Formation and Growth above Forests. *Environmental Science and Technology* **2009**, *43* (18), 6976–6982. <https://doi.org/10.1021/es9007596>.
- (3) Krapcho, A. P.; Larson, J. R.; Eldridge, J. M. Potassium Permanganate Oxidations of Terminal Olefins and Acetylenes to Carboxylic Acids of One Less Carbon. *Journal of Organic Chemistry* **1977**, *42* (23), 3749–3753. <https://doi.org/10.1021/jo00443a026>.
- (4) Rajagopalan, A.; Lara, M.; Kroutil, W. Oxidative Alkene Cleavage by Chemical and Enzymatic Methods. *Advanced Synthesis and Catalysis* **2013**, *355* (17), 3321–3335. <https://doi.org/10.1002/adsc.201300882>.
- (5) Iinuma, Y.; Böge, O.; Keywood, M.; Gnauk, T.; Herrmann, H. Diaterebic Acid Acetate and Diaterpenylic Acid Acetate: Atmospheric Tracers for Secondary Organic Aerosol Formation from 1,8-Cineole Oxidation. *Environmental Science and Technology* **2009**, *43* (2), 280–285. <https://doi.org/10.1021/es802141v>.
- (6) Schmidt, A. K. C.; Stark, C. B. W. TPAP-Catalyzed Direct Oxidation of Primary Alcohols to Carboxylic Acids through Stabilized Aldehyde Hydrates. *Organic Letters* **2011**, *13* (16), 4164–4167. <https://doi.org/10.1021/ol2014335>.
- (7) Spannring, P.; Bruijninx, P. C. A.; Weckhuysen, B. M.; Gebbink, R. J. M. K. A Metal-Free, One-Pot Method for the Oxidative Cleavage of Internal Aliphatic Alkenes into Carboxylic Acids. *RSC Advances* **2013**, *3* (18), 6606–6613. <https://doi.org/10.1039/c3ra40324f>.
- (8) Gomes, M.; Antunes, O. A. C. Upjohn Catalytic Osmium Tetroxide Oxidation Process: Diastereoselective Dihydroxylation of Monoterpenes. *Catalysis Communications* **2001**, *2* (6–7), 225–227. [https://doi.org/10.1016/S1566-7367\(01\)00038-3](https://doi.org/10.1016/S1566-7367(01)00038-3).
- (9) Hanessian, S.; Wang, X.; Ersmark, K.; Del Valle, J. R.; Klegraf, E. Total Synthesis and Structural Revision of the Presumed Aeruginosins 205A and B. *Organic Letters* **2009**, *11* (18), 4232–4235. <https://doi.org/10.1021/ol901702k>.
- (10) Wang, Y.; Ren, J.; Huang, X. H. H.; Tong, R.; Yu, J. Z. Synthesis of Four Monoterpene-Derived Organosulfates and Their Quantification in Atmospheric Aerosol Samples. *Environmental Science and Technology* **2017**, *51* (12), 6791–6801. <https://doi.org/10.1021/acs.est.7b01179>.
- (11) Zhu, Y.; Zhao, X.; Zhu, X.; Wu, G.; Li, Y.; Ma, Y.; Yuan, Y.; Yang, J.; Hu, Y.; Ai, L.; Gao, Q. Design, Synthesis, Biological Evaluation, and Structure-Activity Relationship (SAR) Discussion of Dipeptidyl Boronate Proteasome Inhibitors, Part I: Comprehensive Understanding of the SAR of  $\alpha$ -Amino Acid Boronates. *Journal of Medicinal Chemistry* **2009**, *52* (14), 4192–4199. <https://doi.org/10.1021/jm9005093>.
- (12) Wehner, B.; Philippin, S.; Wiedensohler, A. Design and Calibration of a Thermodenuder with an Improved Heating Unit to Measure the Size-Dependent Volatile Fraction of Aerosol Particles. *Journal of Aerosol Science* **2002**, *33* (7), 1087–1093. [https://doi.org/10.1016/S0021-8502\(02\)00056-3](https://doi.org/10.1016/S0021-8502(02)00056-3).

- (13) Huffman, J. A.; Ziemann, P. J.; Jayne, J. T.; Worsnop, D. R.; Jimenez, J. L. Correction to “Development and Characterization of a Fast-Stepping/Scanning Thermodenuder for Chemically-Resolved Aerosol Volatility Measurements.” *Aerosol Science and Technology* **2008**, 43 (3), 273–273. <https://doi.org/10.1080/02786820802616885>.
- (14) Saha, P. K.; Khlystov, A.; Grieshop, A. P. Determining Aerosol Volatility Parameters Using a ‘Dual Thermodenuder’ System: Application to Laboratory-Generated Organic Aerosols. *Aerosol Science and Technology* **2015**, 6826 (July 2015), 00–00. <https://doi.org/10.1080/02786826.2015.1056769>.
